# Supplementary material for: Occupancy of wild southern pig-tailed macaques in intact and degraded forests in Peninsular Malaysia
Source: PeerJ journal article supplement (doi:10.7717/peerj.12462), 2021-12-14
Supplement: Supplemental_Tables.pdf [file Supplemental_Tables.pdf]

## Occupancy of wild southern pig-tailed macaques in intact and degraded forests in Peninsular Malaysia

Anna Holzner, D. Mark Rayan, Jonathan Moore, Cedric Kai Wei Tan, Laura Clart, Lars Kulik, Hjalmar Kühl, Nadine Ruppert and Anja Widdig

### Supplemental Tables

**Table S1. Candidate models for the detection of *Macaca nemestrina* in the Pasoh Forest Reserve (PFR) and Belum-Temengor Forest Complex (BTFC) with global occupancy models.** Shown are Akaike's Information Criterion corrected for small samples ( $AIC_c$ ), differences in  $AIC_c$  between each model and the respective best model ( $\Delta AIC_c$ ), the probability of each model to be the best model, i.e., the Akaike weights ( $wAIC$ ), and the number of parameters ( $K$ ). Top-ranked models ( $\Delta AIC_c \leq 2$ ) are indicated in bold.

| Candidate models                                                                             | $AIC_c$       | $\Delta AIC_c$ | $wAIC$       | $K$       |
|----------------------------------------------------------------------------------------------|---------------|----------------|--------------|-----------|
| PFR, $\psi$ (edge + elevation) $\gamma$ (forest degradation) $\epsilon$ (forest degradation) |               |                |              |           |
| <b><math>p</math> (effort + sampling year)</b>                                               | <b>2069.5</b> | <b>0</b>       | <b>1</b>     | <b>15</b> |
| $p$ (effort)                                                                                 | 2092.5        | 22.96          | 0            | 11        |
| $p$ (effort + sampling year + sampling month)                                                | 2094.4        | 24.90          | 0            | 24        |
| $p$ (effort + sampling month)                                                                | 2106.7        | 37.25          | 0            | 20        |
| $p$ (sampling year)                                                                          | 2143.5        | 74.01          | 0            | 14        |
| $p$ (.)                                                                                      | 2162.8        | 93.27          | 0            | 10        |
| $p$ (sampling year + sampling month)                                                         | 2162.9        | 93.42          | 0            | 23        |
| $p$ (sampling month)                                                                         | 2175.1        | 105.65         | 0            | 19        |
| BTFC, $\psi$ (habitat + NDVI + settlement + elevation)                                       |               |                |              |           |
| <b><math>p</math> (effort + sampling month)</b>                                              | <b>1238.6</b> | <b>0</b>       | <b>0.995</b> | <b>16</b> |
| $p$ (effort)                                                                                 | 1249.4        | 10.77          | 0.005        | 7         |
| $p$ (sampling month)                                                                         | 1270.8        | 32.21          | 0            | 15        |
| $p$ (.)                                                                                      | 1283.0        | 44.38          | 0            | 6         |

Table S2. Effect of covariates on the detection of *Macaca nemestrina* in the Pasoh Forest Reserve (PFR) and Belum-Temengor Forest Complex (BTFC). Shown are model averaged estimates (zero method), standard errors (SE), and lower and upper 95% confidence intervals (CI). Predictors included into the respective top models ( $\Delta AIC_c \leq 2$ ) are indicated in bold.

| Site | Parameter     | Covariate                                        | Estimate      | SE            | lower CI       | upper CI      |
|------|---------------|--------------------------------------------------|---------------|---------------|----------------|---------------|
| PFR  | Detection $p$ | <b>effort<sup>a</sup></b>                        | <b>0.51</b>   | <b>0.06</b>   | <b>0.39</b>    | <b>0.63</b>   |
|      |               | <b>sampling year (2013 vs. 2014)<sup>b</sup></b> | <b>-0.70</b>  | <b>0.18</b>   | <b>-1.05</b>   | <b>-0.34</b>  |
|      |               | <b>sampling year (2013 vs. 2015)<sup>b</sup></b> | <b>-0.96</b>  | <b>0.18</b>   | <b>-1.32</b>   | <b>-0.61</b>  |
|      |               | <b>sampling year (2013 vs. 2016)<sup>b</sup></b> | <b>-0.71</b>  | <b>0.18</b>   | <b>-1.05</b>   | <b>-0.36</b>  |
|      |               | <b>sampling year (2013 vs. 2017)<sup>b</sup></b> | <b>-0.23</b>  | <b>0.19</b>   | <b>-0.60</b>   | <b>0.14</b>   |
|      |               | sampling month (Jan vs. Feb) <sup>c</sup>        | 0.000009      | 0.005         | -0.29          | 4.64          |
|      |               | sampling month (Jan vs. May) <sup>c</sup>        | 0.000004      | 0.002         | -0.03          | 2.23          |
|      |               | sampling month (Jan vs. Jun) <sup>c</sup>        | 0.000004      | 0.002         | -0.04          | 2.18          |
|      |               | sampling month (Jan vs. Jul) <sup>c</sup>        | 0.000004      | 0.002         | -0.23          | 2.02          |
|      |               | sampling month (Jan vs. Aug) <sup>c</sup>        | 0.000002      | 0.002         | -0.61          | 1.75          |
|      |               | sampling month (Jan vs. Sep) <sup>c</sup>        | 0.000006      | 0.003         | 0.11           | 3.03          |
|      |               | sampling month (Jan vs. Oct) <sup>c</sup>        | 0.000005      | 0.003         | 0.08           | 2.45          |
|      |               | sampling month (Jan vs. Nov) <sup>c</sup>        | 0.000002      | 0.002         | -0.68          | 1.69          |
|      |               | sampling month (Jan vs. Dec) <sup>c</sup>        | 0.000002      | 0.002         | -0.61          | 1.86          |
| BTFC | Detection $p$ | <b>effort<sup>a</sup></b>                        | <b>0.61</b>   | <b>0.12</b>   | <b>0.37</b>    | <b>0.84</b>   |
|      |               | <b>sampling month (Jan vs. Feb)<sup>c</sup></b>  | <b>0.25</b>   | <b>0.26</b>   | <b>-0.25</b>   | <b>0.76</b>   |
|      |               | <b>sampling month (Jan vs. Mar)<sup>c</sup></b>  | <b>0.12</b>   | <b>0.27</b>   | <b>-0.40</b>   | <b>0.64</b>   |
|      |               | <b>sampling month (Jan vs. Apr)<sup>c</sup></b>  | <b>0.44</b>   | <b>0.32</b>   | <b>-0.19</b>   | <b>1.08</b>   |
|      |               | <b>sampling month (Jan vs. May)<sup>c</sup></b>  | <b>0.99</b>   | <b>0.54</b>   | <b>-0.06</b>   | <b>2.04</b>   |
|      |               | <b>sampling month (Jan vs. Aug)<sup>c</sup></b>  | <b>-11.12</b> | <b>314.10</b> | <b>-628.20</b> | <b>605.87</b> |
|      |               | <b>sampling month (Jan vs. Sep)<sup>c</sup></b>  | <b>-2.07</b>  | <b>1.05</b>   | <b>-4.12</b>   | <b>-0.03</b>  |
|      |               | <b>sampling month (Jan vs. Oct)<sup>c</sup></b>  | <b>-0.80</b>  | <b>0.34</b>   | <b>-1.45</b>   | <b>-0.15</b>  |
|      |               | <b>sampling month (Jan vs. Nov)<sup>c</sup></b>  | <b>-0.46</b>  | <b>0.30</b>   | <b>-1.04</b>   | <b>0.12</b>   |
|      |               | <b>sampling month (Jan vs. Dec)<sup>c</sup></b>  | <b>-0.37</b>  | <b>0.30</b>   | <b>-0.96</b>   | <b>0.22</b>   |

<sup>a</sup> z-transformed to mean = 0 and SD = 1 prior to model fitting; original means  $\pm$  SDs were: effort (PFR):  $6.0 \pm 1.8$  days, effort (BTFC):  $12.1 \pm 3.6$  days.

<sup>b</sup> Reference level is '2013'.

<sup>c</sup> Reference level is 'Jan'.

**Table S3. Candidate models for *Macaca nemestrina* occupancy in the Pasoh Forest Reserve (PFR) and Belum-Temengor Forest Complex (BTFC) with best respective detection models.** Shown are Akaike's Information Criterion corrected for small samples (AIC<sub>c</sub>), differences in AIC<sub>c</sub> between each model and the respective best model ( $\Delta$ AIC<sub>c</sub>), the probability of each model to be the best model, i.e., the Akaike weights (wAIC), and the number of parameters (K). Top-ranked models ( $\Delta$ AIC<sub>c</sub>  $\leq$  2) are indicated in bold.

| Candidate models                                                                                | AIC <sub>c</sub> | $\Delta$ AIC <sub>c</sub> | wAIC         | K         |
|-------------------------------------------------------------------------------------------------|------------------|---------------------------|--------------|-----------|
| <b>PFR, <math>\rho</math> (effort + sampling year)</b>                                          |                  |                           |              |           |
| <b><math>\psi</math> (.) <math>\gamma</math> (.) <math>\epsilon</math> (forest degradation)</b> | <b>2056.4</b>    | <b>0</b>                  | <b>0.633</b> | <b>11</b> |
| $\psi$ (elevation) $\gamma$ (.) $\epsilon$ (forest degradation)                                 | 2059.4           | 3.03                      | 0.139        | 12        |
| $\psi$ (edge) $\gamma$ (.) $\epsilon$ (forest degradation)                                      | 2059.5           | 3.05                      | 0.138        | 12        |
| $\psi$ (.) $\gamma$ (forest degradation) $\epsilon$ (forest degradation)                        | 2062.6           | 6.21                      | 0.028        | 13        |
| $\psi$ (edge + elevation) $\gamma$ (.) $\epsilon$ (forest degradation)                          | 2062.7           | 6.30                      | 0.027        | 13        |
| $\psi$ (.) $\gamma$ (.) $\epsilon$ (.)                                                          | 2064.0           | 7.60                      | 0.014        | 9         |
| $\psi$ (elevation) $\gamma$ (forest degradation) $\epsilon$ (forest degradation)                | 2065.9           | 9.52                      | 0.005        | 14        |
| $\psi$ (edge) $\gamma$ (forest degradation) $\epsilon$ (forest degradation)                     | 2065.9           | 9.54                      | 0.005        | 14        |
| $\psi$ (elevation) $\gamma$ (.) $\epsilon$ (.)                                                  | 2066.8           | 10.38                     | 0.004        | 10        |
| $\psi$ (edge) $\gamma$ (.) $\epsilon$ (.)                                                       | 2066.8           | 10.40                     | 0.003        | 10        |
| $\psi$ (edge + elevation) $\gamma$ (forest degradation) $\epsilon$ (forest degradation)         | 2069.5           | 13.09                     | 0.001        | 15        |
| $\psi$ (.) $\gamma$ (forest degradation) $\epsilon$ (.)                                         | 2069.7           | 13.29                     | 0.001        | 11        |
| $\psi$ (edge + elevation) $\gamma$ (.) $\epsilon$ (.)                                           | 2069.8           | 13.39                     | 0.001        | 11        |
| $\psi$ (elevation) $\gamma$ (forest degradation) $\epsilon$ (.)                                 | 2072.7           | 16.32                     | 0            | 12        |
| $\psi$ (edge) $\gamma$ (forest degradation) $\epsilon$ (.)                                      | 2072.7           | 16.33                     | 0            | 12        |
| $\psi$ (edge + elevation) $\gamma$ (forest degradation) $\epsilon$ (.)                          | 2076.0           | 19.59                     | 0            | 13        |
| <b>BTFC, <math>\rho</math> (effort + sampling month)</b>                                        |                  |                           |              |           |
| <b><math>\psi</math> (elevation)</b>                                                            | <b>1232.1</b>    | <b>0</b>                  | <b>0.415</b> | <b>13</b> |
| $\psi$ (NDVI + elevation)                                                                       | 1234.2           | 2.04                      | 0.149        | 14        |
| $\psi$ (settlement + elevation)                                                                 | 1234.3           | 2.19                      | 0.139        | 14        |
| $\psi$ (habitat + elevation)                                                                    | 1234.4           | 2.24                      | 0.135        | 14        |
| $\psi$ (NDVI + settlement + elevation)                                                          | 1236.3           | 4.19                      | 0.051        | 15        |
| $\psi$ (habitat + NDVI + elevation)                                                             | 1236.4           | 4.28                      | 0.049        | 15        |
| $\psi$ (habitat + settlement + elevation)                                                       | 1236.6           | 4.42                      | 0.046        | 15        |
| $\psi$ (habitat + NDVI + settlement + elevation)                                                | 1238.6           | 6.45                      | 0.016        | 16        |
| $\psi$ (habitat + settlement)                                                                   | 1260.9           | 28.78                     | 0            | 14        |
| $\psi$ (habitat + NDVI + settlement)                                                            | 1261.2           | 29.07                     | 0            | 15        |
| $\psi$ (habitat)                                                                                | 1268.8           | 36.66                     | 0            | 13        |
| $\psi$ (habitat + NDVI)                                                                         | 1269.4           | 37.27                     | 0            | 14        |
| $\psi$ (NDVI + settlement)                                                                      | 1271.4           | 39.29                     | 0            | 14        |
| $\psi$ (NDVI)                                                                                   | 1271.7           | 39.54                     | 0            | 13        |
| $\psi$ (.)                                                                                      | 1274.3           | 42.19                     | 0            | 12        |
| $\psi$ (settlement)                                                                             | 1275.6           | 43.51                     | 0            | 13        |
